# Supplementary material for: Salmon food matrix influences digestion and bioavailability of long-chain omega-3 polyunsaturated fatty acids
Source: Royal Society of Chemistry journal article supplement (doi:10.1039/d1fo00475a), 2021-01-01
Supplement: d1fo00475a1.pdf [file d1fo00475a1.pdf]

## Supplementary Information

The particle sizes of the minced salmon and chewed (chopped) intact salmon were measured (Fig. S1). Over 80% of the minced salmon was 0.038 mm or under in size. The intact salmon was chopped and had a mean particle size distribution of between 0.425 and 0.5 mm, which is less than the maximum size required to induce swallowing (~ 1 mm).<sup>31</sup>

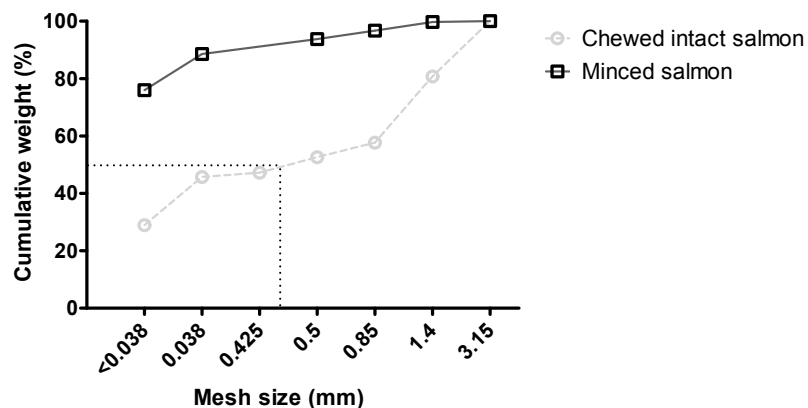

Fig. S1 Particle size cumulative weight percentage. The dashed line represents the mean

Table S1 Simulated salivary fluid (SSF) and simulated gastric fluid (SGF) stock solutions<sup>30</sup> used in the *in vitro* digestion experiments. The SGF was then adjusted to pH 1.5

| Salt solution added                               | SSF (pH 7)           |       |                                            |                         | SGF (pH 7)                                 |                         |
|---------------------------------------------------|----------------------|-------|--------------------------------------------|-------------------------|--------------------------------------------|-------------------------|
|                                                   | Stock concentrations |       | mL of Stock added to prepare 0.4 L (1.25x) | Final salt conc. in SSF | mL of Stock added to prepare 0.4 L (1.25x) | Final salt conc. in SGF |
|                                                   | g/L                  | mol/L | mL                                         | mmol/L                  | mL                                         | mmol/L                  |
| KCl                                               | 37.3                 | 0.5   | 15.1                                       | 15.1                    | 6.9                                        | 6.9                     |
| KH <sub>2</sub> PO <sub>4</sub>                   | 68                   | 0.5   | 3.7                                        | 3.7                     | 0.9                                        | 0.9                     |
| NaHCO <sub>3</sub>                                | 84                   | 1     | 6.8                                        | 13.6                    | 12.5                                       | 25                      |
| NaCl                                              | 117                  | 2     | –                                          | –                       | 11.8                                       | 47.2                    |
| MgCl <sub>2</sub> (H <sub>2</sub> O) <sub>6</sub> | 30.5                 | 0.15  | 0.5                                        | 0.15                    | 0.4                                        | 0.12                    |
| (NH <sub>4</sub> ) <sub>2</sub> CO <sub>3</sub>   | 48                   | 0.5   | 0.06                                       | 0.06                    | 0.5                                        | 0.5                     |
| CaCl <sub>2</sub> (H <sub>2</sub> O) <sub>2</sub> | 44.1                 | 0.3   |                                            | 1.5                     |                                            | 0.15                    |
| HCl                                               |                      | 6     | 0.09                                       | 1.1                     | –                                          | –                       |

Table S2 Number of participants with plasma samples collected per time point

| Time point (h)        | 0  | 0.5 | 1  | 2  | 3  | 4  | 6  |
|-----------------------|----|-----|----|----|----|----|----|
| Intact salmon         | 13 | 12  | 13 | 13 | 13 | 13 | 13 |
| Minced salmon         | 13 | 13  | 13 | 13 | 13 | 12 | 13 |
| Defatted salmon + oil | 13 | 13  | 13 | 13 | 13 | 13 | 13 |

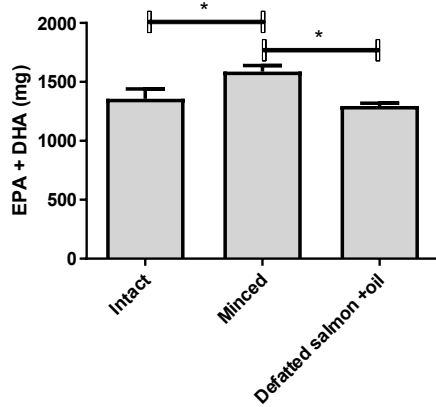

**Fig. S2** Average EPA+DHA concentration in all meals used in the study. Intact salmon and minced salmon meal (n=13); defatted salmon + oil meal (n=11). \* represents statistical significance ( $p < 0.05$ ). All data represented as mean and SEM.

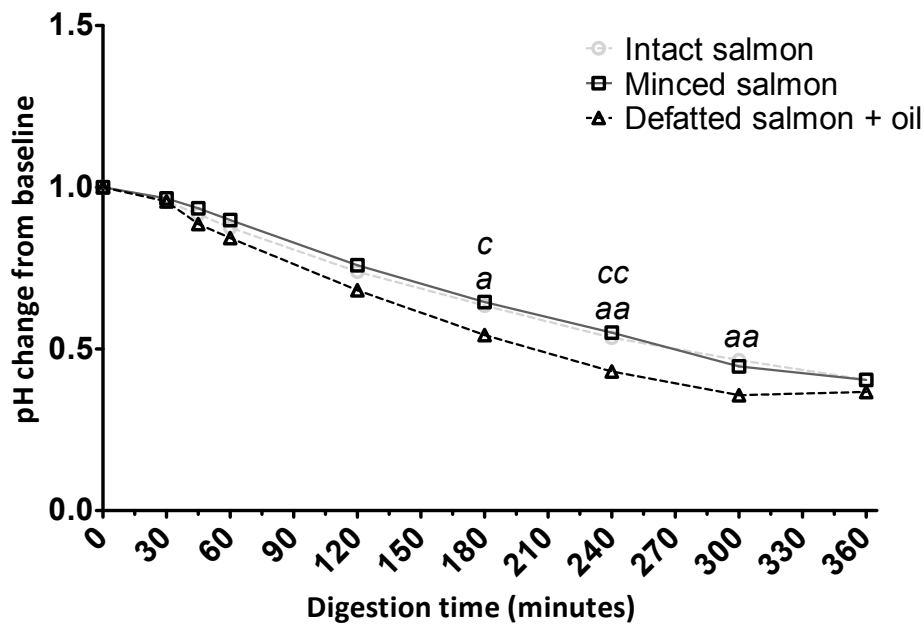

**Fig. S3** pH of study meal samples during the *in vitro* digestion (n = 3). Statistical significance represented by: a for intact salmon meal versus defatted salmon + oil meal; b for intact salmon meal versus minced salmon meal; c for minced salmon meal versus defatted salmon + oil meal. a represents statistical significance ( $p < 0.05$ ), aa ( $p < 0.01$ ), aaa ( $p < 0.001$ ). All data represented as mean and SEM.

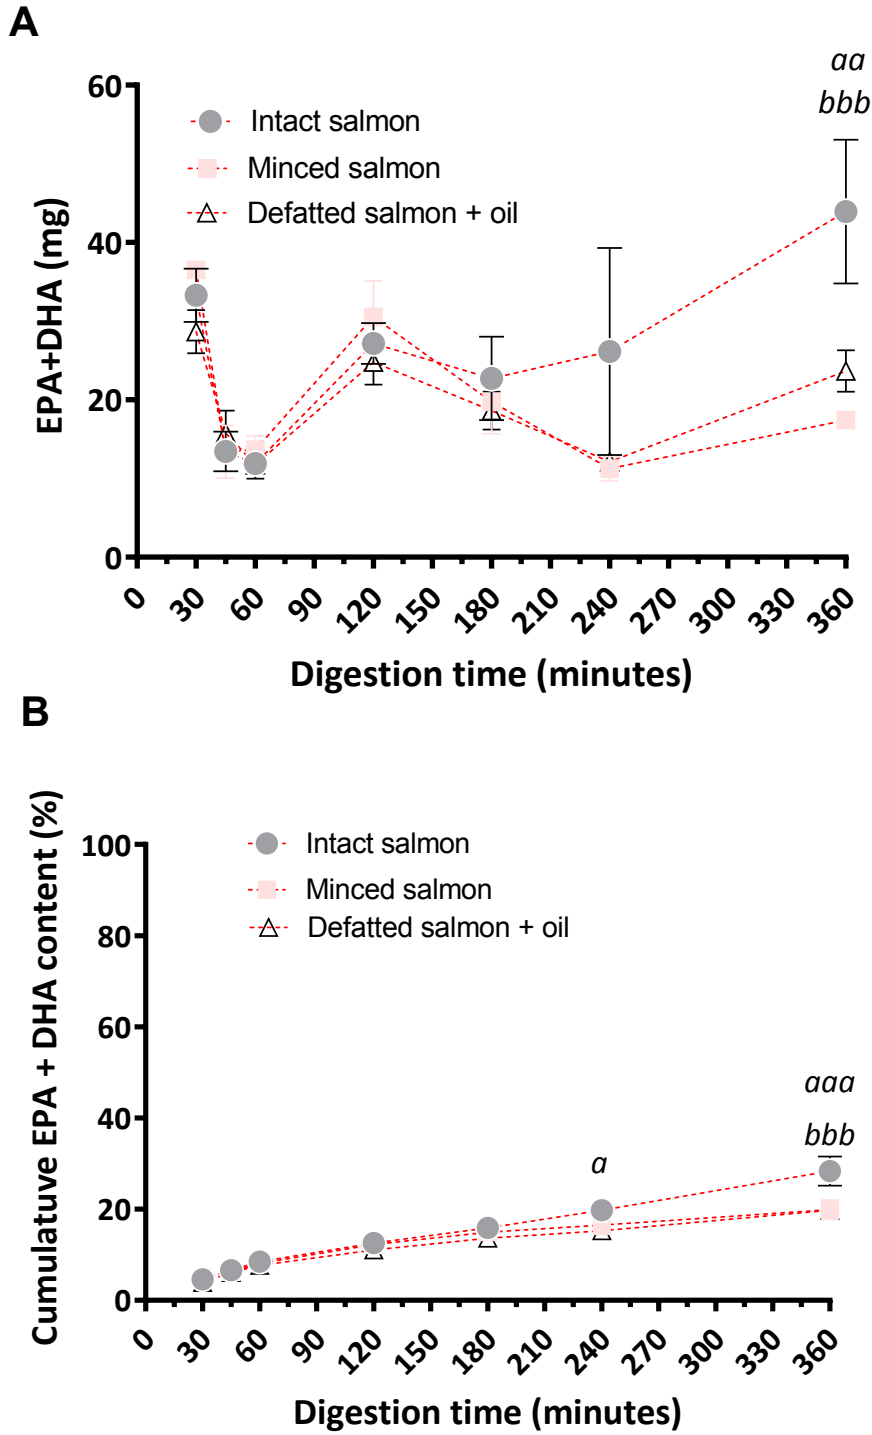

**Fig. S4** EPA+DHA emptied from the HGS during the 6 h of the study meal digestion ( $n = 3$ ). (a) Raw data (b) Cumulative percentage of theoretical recovery of EPA+DHA. Statistical significance represented by: *a* for intact salmon meal versus defatted salmon + oil meal; *b* for intact salmon meal versus minced salmon meal; *c* for minced salmon meal versus defatted salmon + oil meal. *a* represents statistical significance ( $p < 0.05$ ), *aa* ( $p < 0.01$ ), *aaa* ( $p < 0.001$ ). All data represented as mean and SEM.

**Table S3.** Proximate analysis of a typical study meal containing 117 g salmon, 108 ml cream, 30 g potato flakes and 72 g water.

| <b>Moisture %</b> | <b>Protein %</b> | <b>Fat %</b> | <b>Carbohydrate %</b> |
|-------------------|------------------|--------------|-----------------------|
| 63.4              | 8.9              | 18.9         | 7.8                   |
